# Supplementary material
Source: MDPI journal article supplement (https://www.mdpi.com/2073-4441/15/20/3686)
Supplement: s1 [file s1]

## Supplementary data

### Effects of aniline-promoted electron shuttle-mediated goethite reduction by *Shewanella oneidensis* MR-1 and degradation of aniline

Mengmeng Tang, Chaoyong Wang \*, Zaitian Dong, Qianjin Che, Zetang Wang and Yuxuan Zhu

\*Corresponding author. Email: [wangcy@cumt.edu.cn](mailto:wangcy@cumt.edu.cn)

#### Tables captions:

Table S1 Effect of different concentrations of AQS on Fe (II) production in the bio-reduction process of goethite. (a) Fe (II) content in the reaction system. (Data for [Fig. 2 a](#))

Table S2 Effect of different concentrations of aniline on the production of Fe (II) during AQS-mediated goethite bio-reduction. (Data for [Fig. 3](#))

Table S3 Consumption of sodium lactate during AQS-mediated Fe (III) bio-reduction. (Data for [Fig. 4a](#))

Table S4 Impact of aniline on sodium lactate consumption during AQS-mediated Fe (III) bio-reduction. (Data for [Fig. 4 c](#))

Table S5 Change in aniline concentration. (Data for [Fig. 5 a](#))

*Table S1* Effect of different concentrations of AQS on Fe (II) production in the bio-reduction process of goethite. Fe (II) content in the reaction system (Data for Fig. 2 a)

| Group              | 0h          | 8h            | 20h            | 32h            | 48h            | 72h            |
|--------------------|-------------|---------------|----------------|----------------|----------------|----------------|
| GT+MR-1            | 0.00±0.00Da | 50.58±10.00Cb | 67.00±12.02Cb  | 99.37±14.02Bc  | 116.28±13.02Bc | 143.33±11.02Ad |
| GT+MR-1+0.1 mM AQS | 0.00±0.00Fa | 59.76±12.01Eb | 90.68±14.03Dab | 135.12±13.02Cb | 190.70±11.01Bb | 230.98±15.00Ac |
| GT+MR-1+0.3 mM AQS | 0.00±0.00Fa | 54.44±12.02Eb | 92.50±14.02Db  | 140.81±23.02Cb | 210.57±18.02Bb | 260.92±13.26Ab |
| GT+MR-1+0.5 mM AQS | 0.00±0.00Fa | 81.49±9.88Ea  | 125.11±19.85Da | 210.61±13.85Ca | 250.86±8.37Ba  | 320.91±4.65Aa  |

Data are presented as mean ± SD (n=3). The same uppercase letters in the same row indicate that the difference is not significant, otherwise the difference is significant; the same lowercase letters in the same column indicate that the difference is not significant, otherwise the difference is significant.

*Table S2* Effect of different concentrations of aniline on the production of Fe (II) during AQS-mediated goethite bio-reduction (Data for Fig. 3)

| Group                          | 0h          | 8h            | 20h             | 32h             | 48h            | 72h             |
|--------------------------------|-------------|---------------|-----------------|-----------------|----------------|-----------------|
| GT+Aniline                     | 0.00±0.00Aa | 0.00±0.00Ac   | 0.00±00.00Ad    | 0.00±00.00Ad    | 0.00±0.00Ad    | 0.00±0.00Ad     |
| GT+MR-1+1 µM Aniline           | 0.00±0.00Fa | 40.50±12.02Eb | 70.00±14.02Dc   | 105.37±13.02Cc  | 130.28±11.02Bc | 185.32±15.00Ac  |
| GT+MR-1+0.5 mM AQS+1µM Aniline | 0.00±0.00Fa | 50.44±12.02Eb | 108.22±14.02Dab | 160.81±23.02Cab | 200.57±18.02Bb | 260.92±13.26Ab  |
| GT+MR-1+0.5 mM AQS+3µM Aniline | 0.00±0.00Ea | 81.50±17.02Da | 120.11±20.02Da  | 180.61±25.02Ca  | 265.86±22.02Ba | 340.91±35.22Aa  |
| GT+MR-1+0.5 mM AQS+7µM Aniline | 0.00±0.00Da | 59.76±17.02Cb | 90.68±20.02Cbc  | 135.12±15.02Bbc | 190.7±23.02Ab  | 224.98±18.22Abc |

Data are presented as mean ± SD (n=3). The same uppercase letters in the same row indicate that the difference is not significant, otherwise the difference is significant; the same lowercase letters in the same column indicate that the difference is not significant, otherwise the difference is significant.

*Table S3* Consumption of sodium lactate during AQS-mediated Fe (III) bio-reduction. (Data for Fig. 4a)

| Group              | 0h          | 8h           | 20h         | 32h         | 48h         | 72h         |
|--------------------|-------------|--------------|-------------|-------------|-------------|-------------|
| GT+MR-1            | 1.00±0.00Aa | 0.97±0.03Ba  | 0.94±0.02Ca | 0.91±0.02Da | 0.89±0.03Ea | 0.87±0.02Ea |
| GT+MR-1+0.1 mM AQS | 1.00±0.00Aa | 0.95±0.02Bab | 0.84±0.03Cb | 0.75±0.02Db | 0.60±0.02Eb | 0.50±0.03Fb |
| GT+MR-1+0.3 mM AQS | 1.00±0.00Aa | 0.92±0.02Bb  | 0.71±0.03Cc | 0.65±0.01Dc | 0.55±0.03Ec | 0.39±0.04Fc |
| GT+MR-1+0.5 mM AQS | 1.00±0.00Aa | 0.85±0.02Bc  | 0.64±0.02Cd | 0.55±0.03Dd | 0.41±0.02Ed | 0.31±0.02Fd |

Data are presented as mean ± SD (n=3). The same uppercase letters in the same row indicate that the difference is not significant, otherwise the difference is significant; the same lowercase letters in the same column indicate that the difference is not significant, otherwise the difference is significant.

*Table S4* Impact of aniline on sodium lactate consumption during AQS-mediated Fe (III) bio-reduction (Data for Fig. 4 c)

| Group                          | 0h          | 8h           | 20h         | 32h         | 48h         | 72h         |
|--------------------------------|-------------|--------------|-------------|-------------|-------------|-------------|
| GT+MR-1+1μM Aniline            | 1.00±0.00Aa | 0.97±0.02Ba  | 0.87±0.02Ca | 0.84±0.03Ca | 0.75±0.02Da | 0.73±0.02Da |
| GT+MR-1+0.5mM AQS              | 1.00±0.00Aa | 0.85±0.02Bbc | 0.66±0.02Cc | 0.56±0.03Dc | 0.43±0.01Ec | 0.31±0.03Fd |
| GT+MR-1+0.5mM AQS+1μM Ani line | 1.00±0.00Aa | 0.83±0.01Bc  | 0.76±0.02Cb | 0.63±0.03Db | 0.55±0.02Eb | 0.35±0.02Fc |
| GT+MR-1+0.5mM AQS+3μM Ani line | 1.00±0.00Aa | 0.77±0.01Bd  | 0.61±0.02Cc | 0.50±0.03Dc | 0.38±0.02Ec | 0.28±0.02Fd |
| GT+MR-1+0.5mM AQS+7μM Ani line | 1.00±0.00Aa | 0.86±0.02Bb  | 0.78±0.02Cb | 0.66±0.03Db | 0.53±0.02Eb | 0.45±0.02Fb |

Data are presented as mean ± SD (n=3). The same uppercase letters in the same row indicate that the difference is not significant, otherwise the difference is significant; the same lowercase letters in the same column indicate that the difference is not significant, otherwise the difference is significant.

*Table S5* Change in aniline concentration (Data for [Fig. 5 a](#))

| Group                               | 0h                | 8h                 | 20h               | 32h               | 48h               | 72h                |
|-------------------------------------|-------------------|--------------------|-------------------|-------------------|-------------------|--------------------|
| GT+MR-1+1 $\mu$ M Aniline           | 1.00 $\pm$ 0.00Aa | 0.87 $\pm$ 0.05Bb  | 0.75 $\pm$ 0.02Cb | 0.65 $\pm$ 0.05Db | 0.44 $\pm$ 0.04Eb | 0.39 $\pm$ 0.02Eb  |
| GT+MR-1+0.5mM AQS+1 $\mu$ M Aniline | 1.00 $\pm$ 0.00Aa | 0.90 $\pm$ 0.02Bab | 0.70 $\pm$ 0.03Cc | 0.63 $\pm$ 0.03Db | 0.47 $\pm$ 0.03Eb | 0.43 $\pm$ 0.03Fab |
| GT+MR-1+0.5mM AQS+3 $\mu$ M Aniline | 1.00 $\pm$ 0.00Aa | 0.81 $\pm$ 0.02Bc  | 0.62 $\pm$ 0.03Cd | 0.45 $\pm$ 0.03Dc | 0.32 $\pm$ 0.04Ec | 0.25 $\pm$ 0.04Fc  |
| GT+MR-1+0.5mM AQS+7 $\mu$ M Aniline | 1.00 $\pm$ 0.00Aa | 0.94 $\pm$ 0.04Ba  | 0.83 $\pm$ 0.03Ca | 0.74 $\pm$ 0.03Da | 0.65 $\pm$ 0.03Ea | 0.47 $\pm$ 0.02Fa  |

Data are presented as mean  $\pm$  SD (n=3). The same uppercase letters in the same row indicate that the difference is not significant, otherwise the difference is significant; the same lowercase letters in the same column indicate that the difference is not significant, otherwise the difference is significant.
